# Supplementary material
Source: Royal Society of Chemistry journal article supplement (doi:10.1039/d6tb00609d)
Supplement: d6tb00609d1.pdf [file d6tb00609d1.pdf]

## Supplementary Information

### **Combined improvement of osteogenic and anti-inflammatory activities of Sr-doped bone cement modified with carboxymethyl cellulose**

Xiao-Dan Li<sup>a,c</sup>, Da-Wei Yan<sup>a,\*</sup>, Hao-Hao Ren<sup>a</sup>, Hai-Tao Peng<sup>d</sup>, Kun Zhao<sup>c,\*</sup>, Qi-Yi Zhang<sup>b,\*</sup>, Yong-Gang Yan

<sup>a</sup>College of Physics, Sichuan University, Chengdu, 610064, China.

<sup>b</sup>School of Chemical Engineering, Sichuan University, Chengdu, 610065, China.

<sup>c</sup>Institute of Fundamental and Frontier Sciences, University of Electronic Science and Technology of China, Chengdu, 611731, China.

<sup>d</sup>State Key Laboratory of Biotherapy, West China Hospital, Sichuan University, Chengdu, 610041, China.

\*Corresponding Authors: Qi-Yi Zhang, Da-Wei Yan, and Kun Zhao.

E-mail address: qyzhang-scu@163.com, yandawei@scu.edu.cn,

kzhao@uestc.edu.cn.

## 1. Supplementary Figures

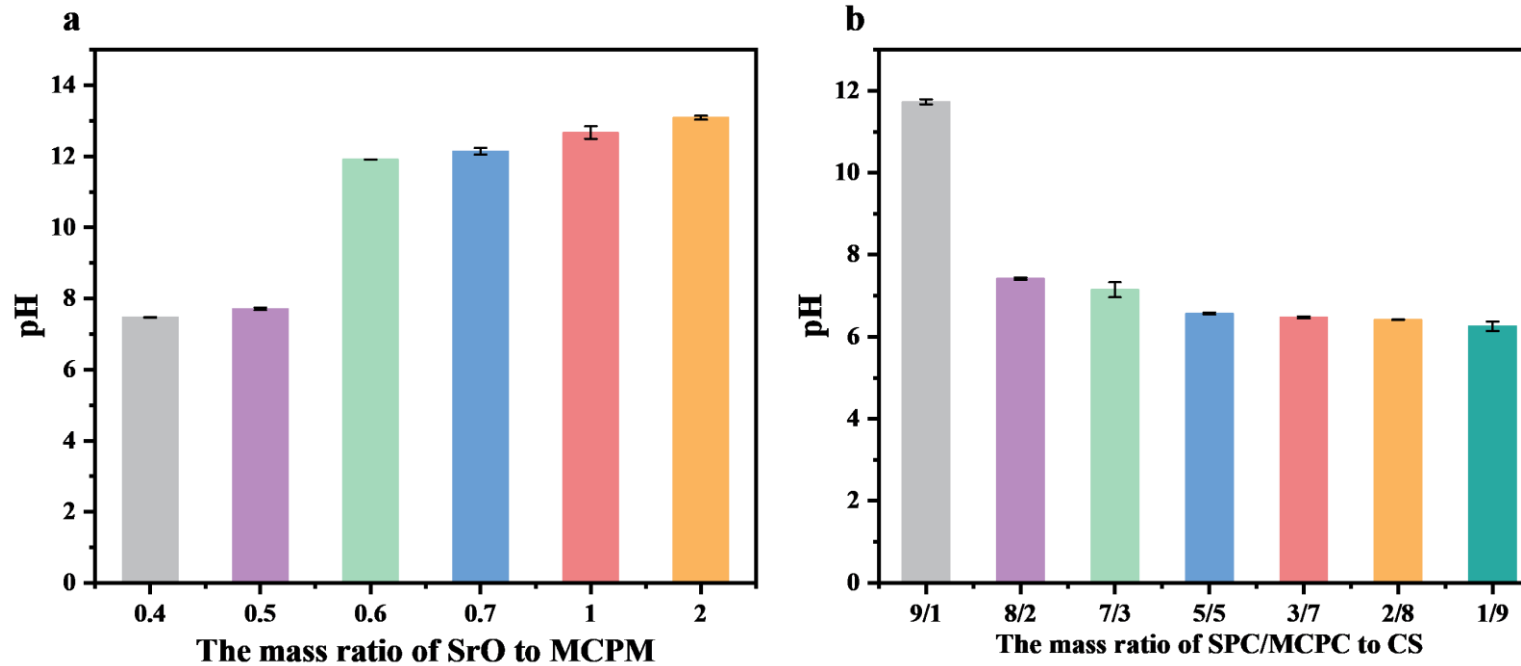

**Figure S1. Screening of the optimal ratio of composite bone cement.**

**The optimal ratio of SrO and MCPM:** After screening the pH values of different mass ratios of SrO and MCPM cement samples in PBS solution, the optimal mass ratio of SrO to MCPM is 3:5 because its pH is close to 12, allowing a pH buffer for the subsequent CS with a pH of about 4.5.

**The optimal ratio of SrO/MCPM and CS:** To promote the degradation of the composite bone cement and provide an adequate calcium source, CS was added to the SrO/MCPM composite. The optimal mass ratio of the inorganic phase was set as SrO:MCPM: CS = 3:5:2 because its pH

value is close to 7.4.

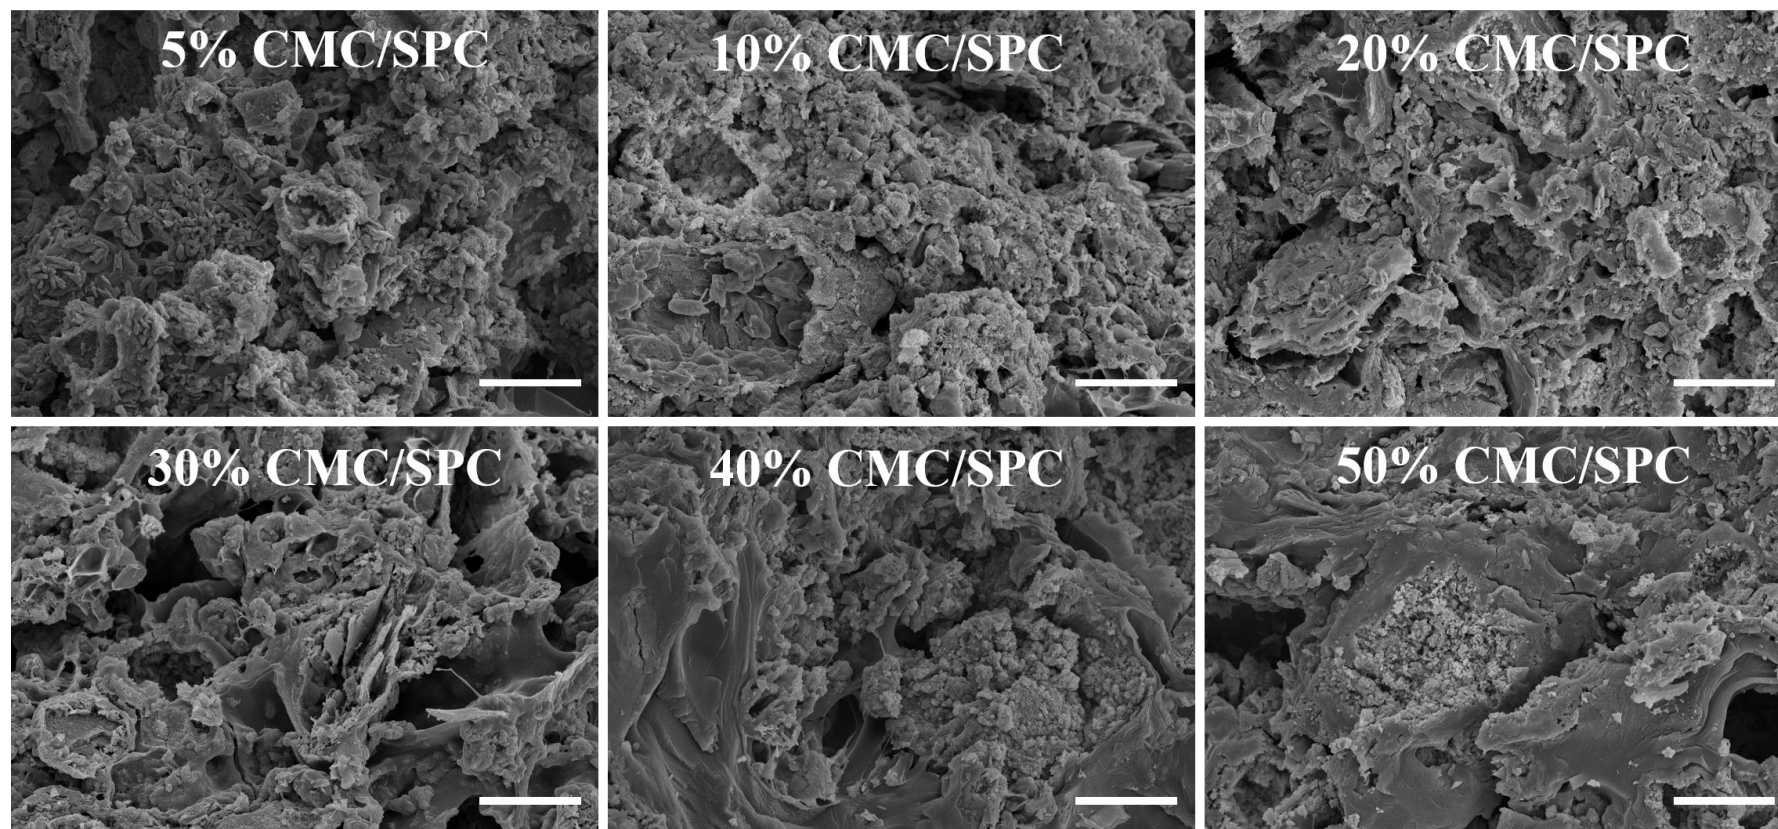

**Figure S2.** The cross-sectional morphology of CMC/SPC (Scale bar: 20 μm).

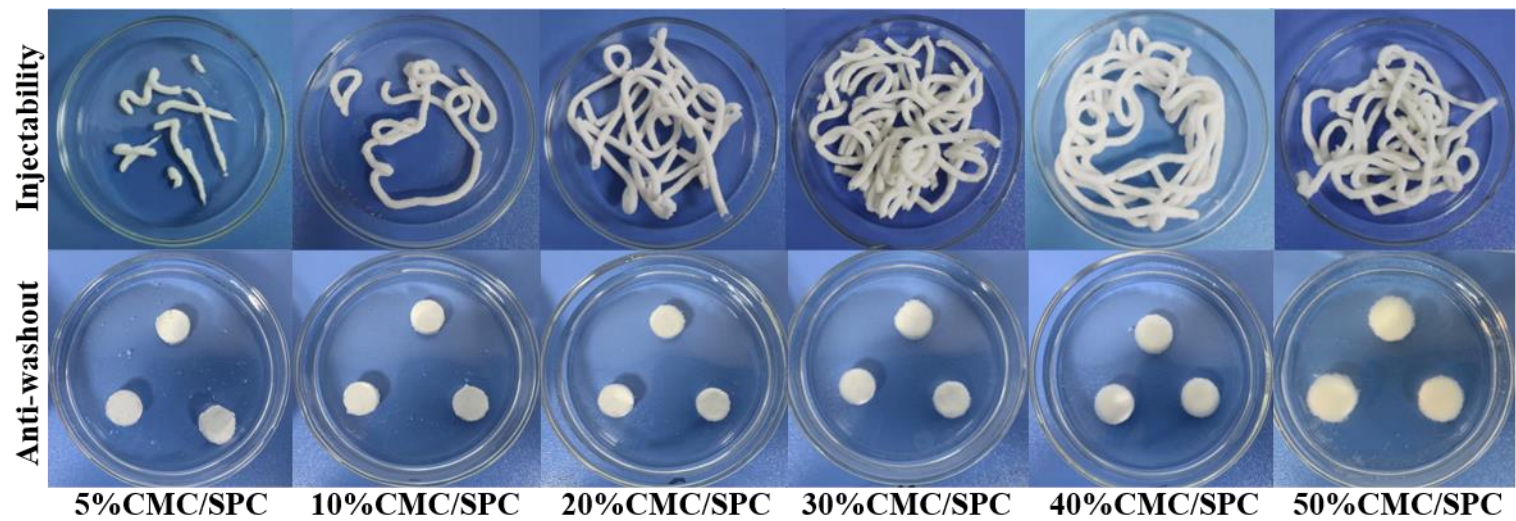

**Figure S3. Digital images of injectability and anti-washout.**

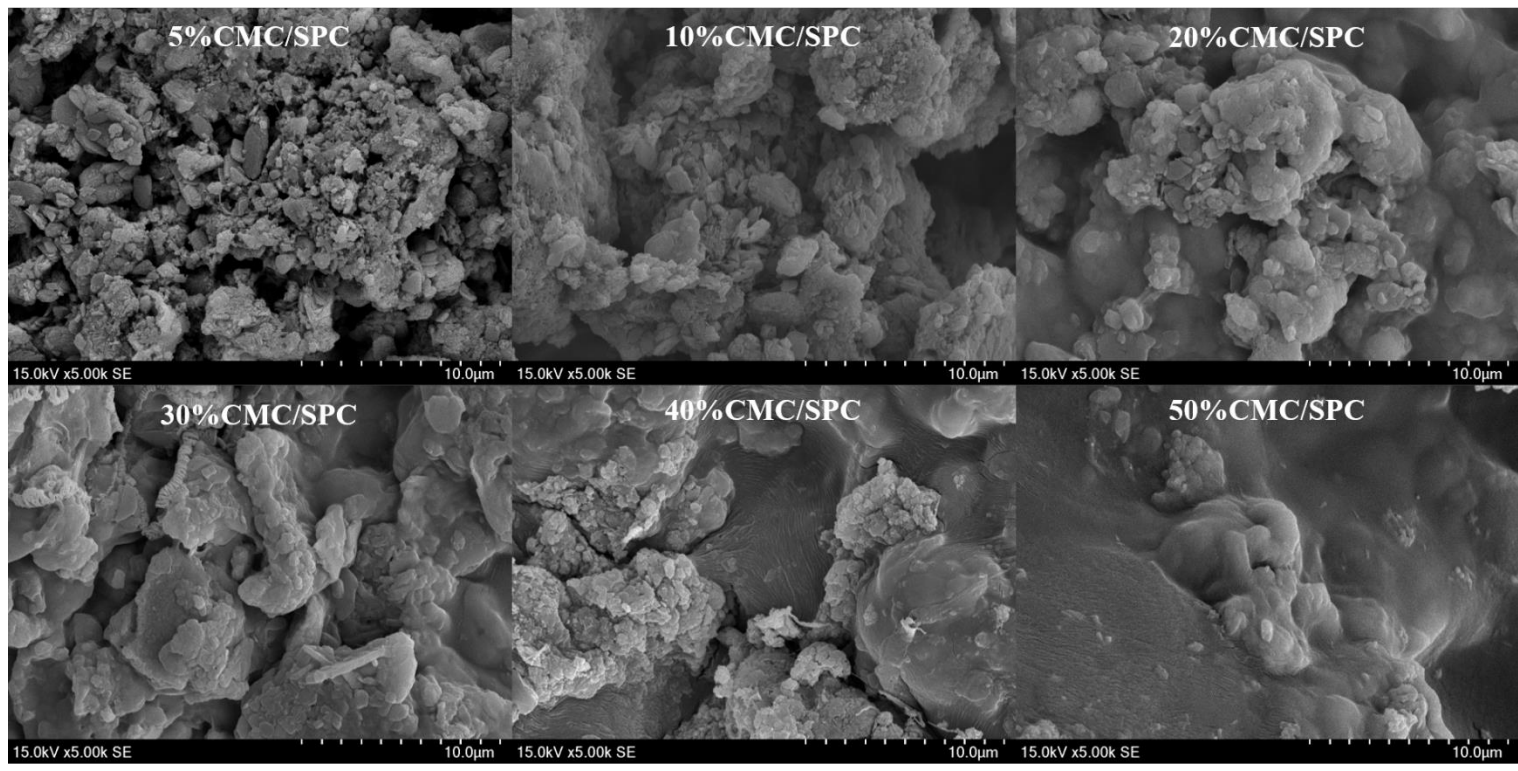

**Figure S4. The surface morphology of 5-50%CMC/SPC before mineralization.**

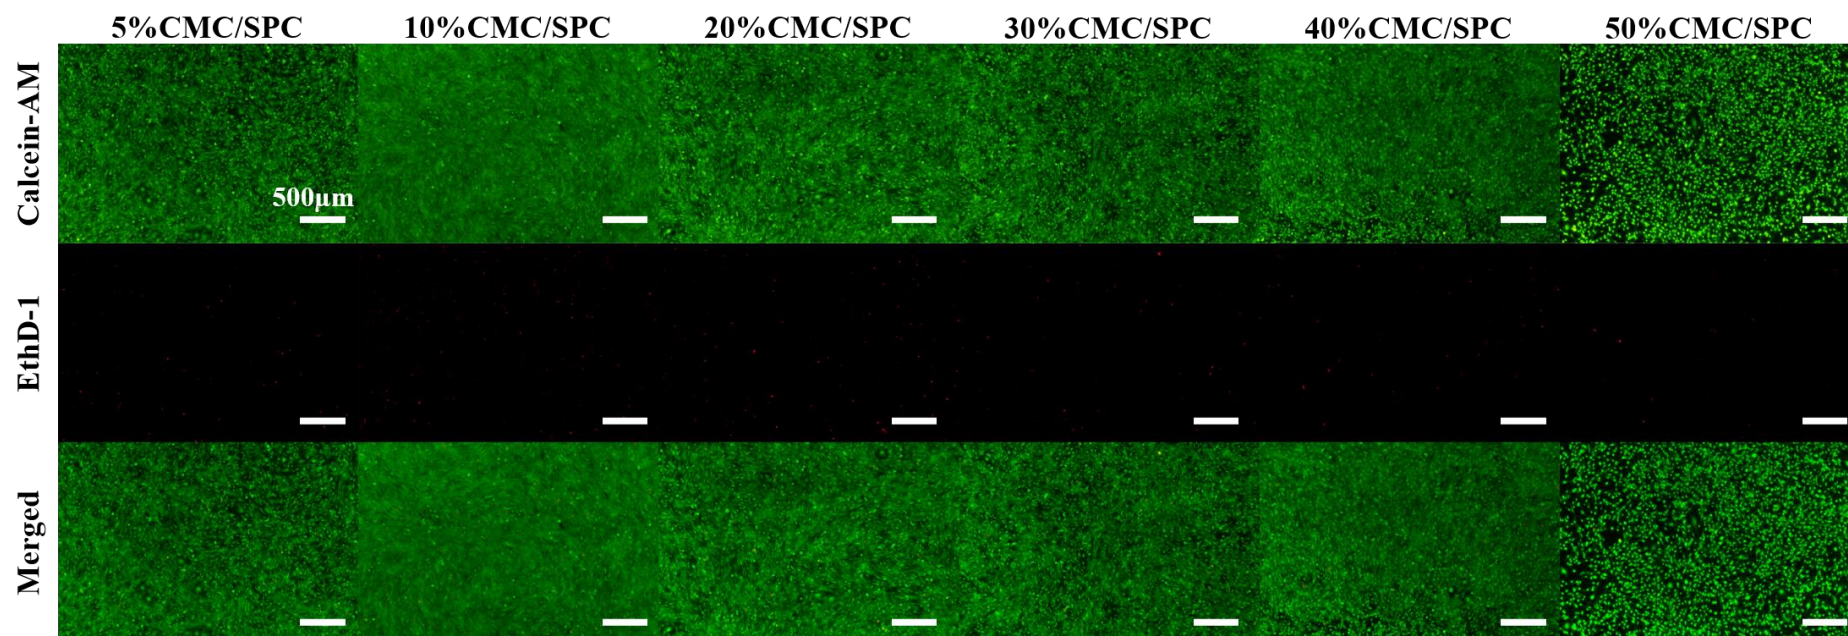

Figure S5. Fluorescent pictures of living and dead cells for 4 days (green: live cells, red: dead cells).

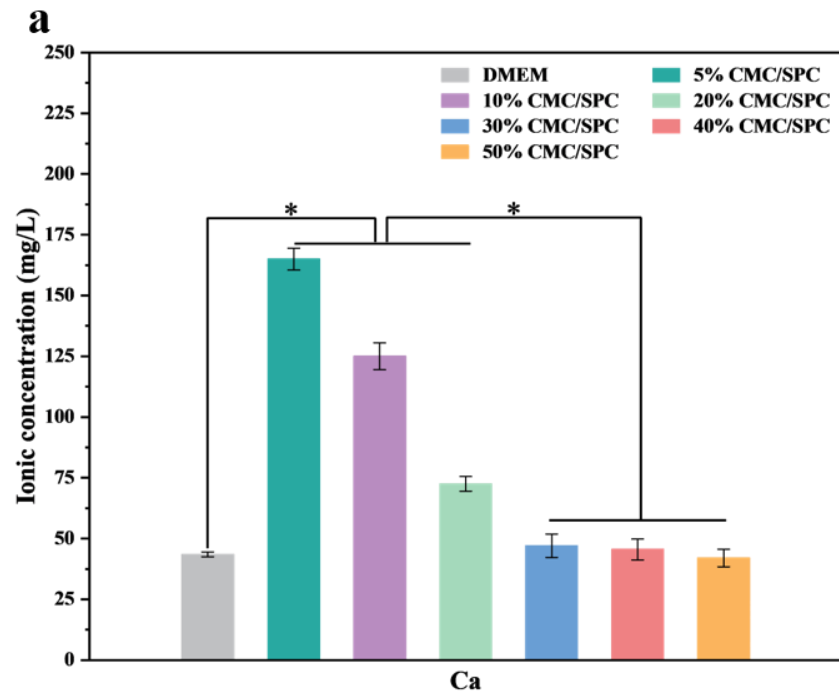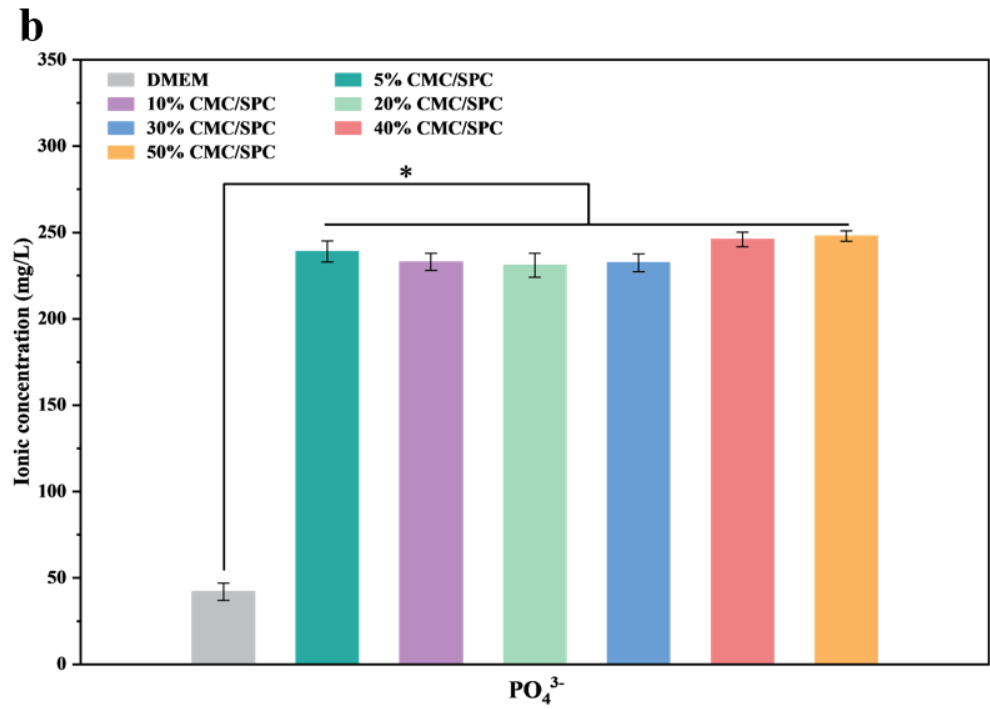

Figure S6. The Ca<sup>2+</sup> and PO<sub>4</sub><sup>3-</sup> concentrations of CMC/SPC extracts (100 mg/mL).

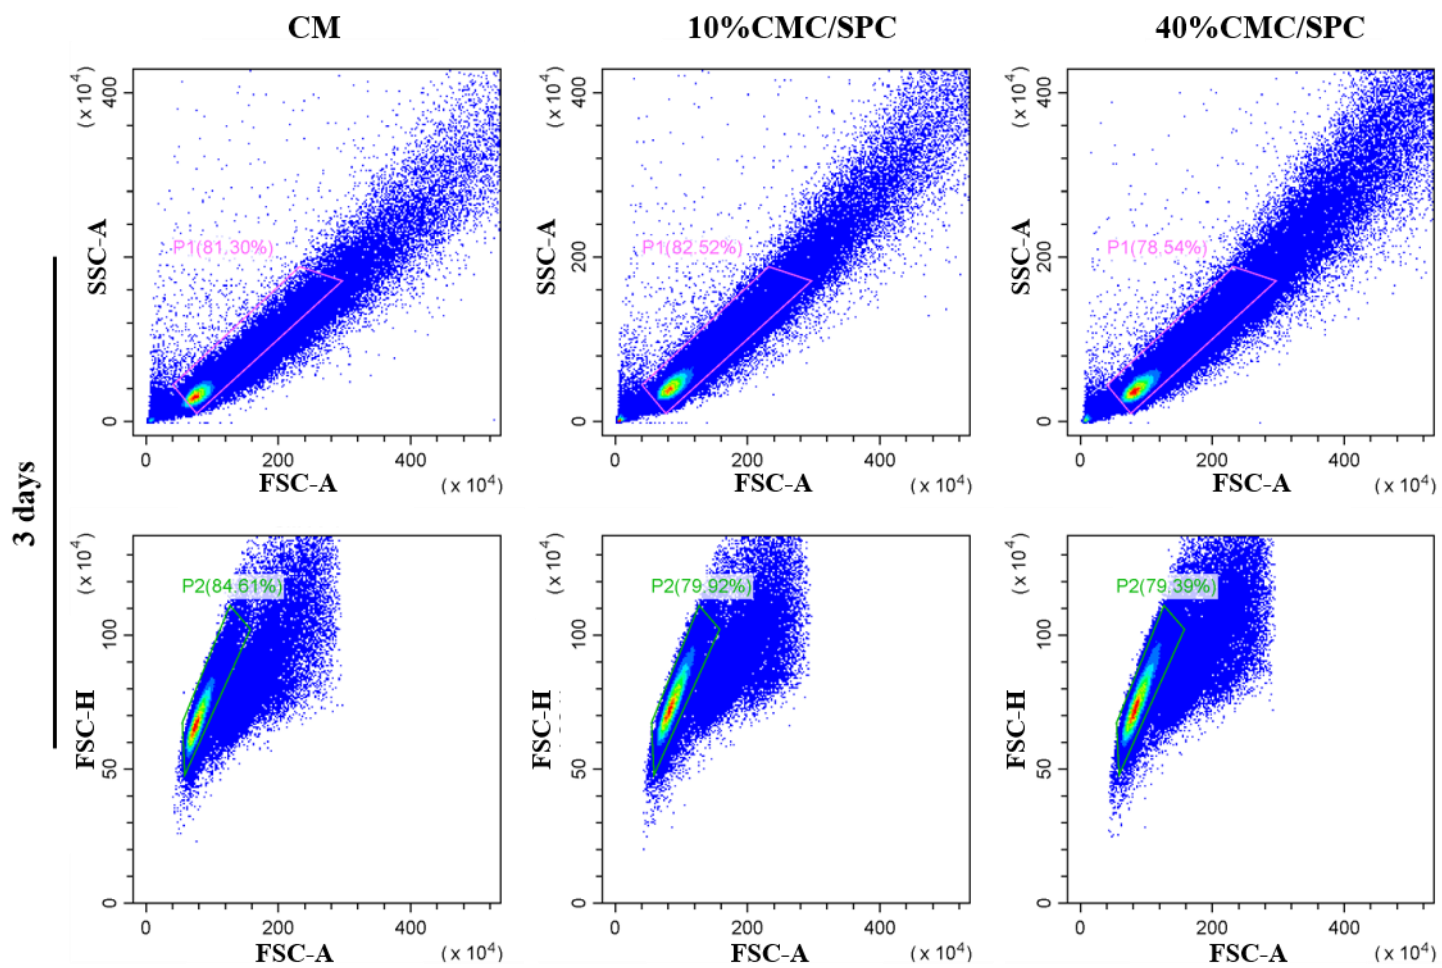

**Figure S7. Flow cytometry data analysis.**

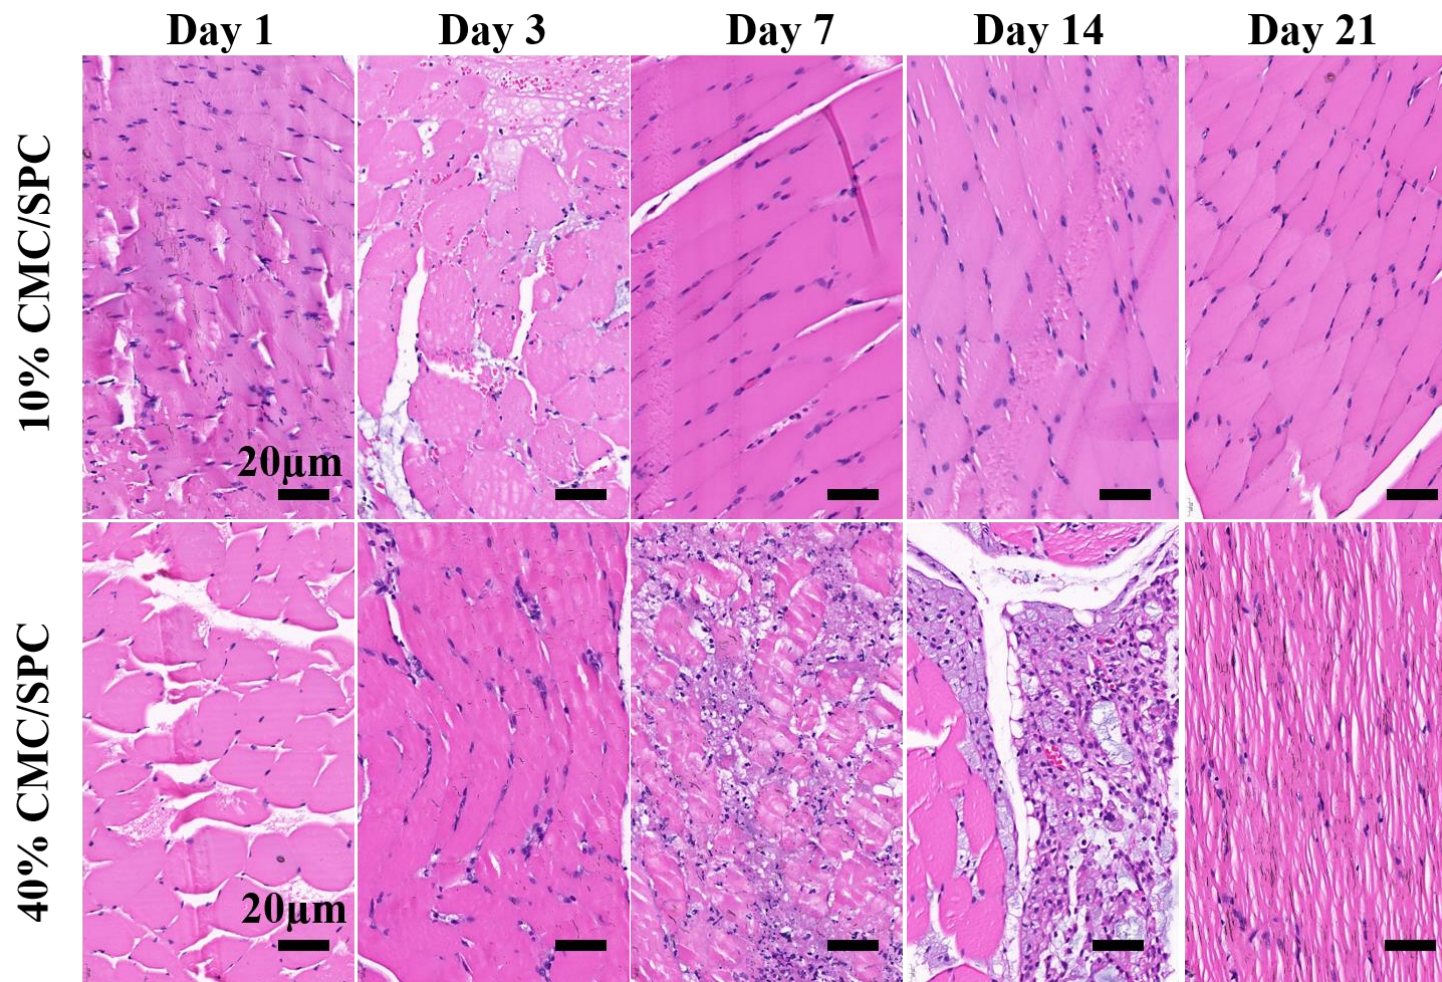

**Figure S8. Representative H&E staining of implants on days 1, 3, 7, 14, and 21 after implanting in the mouse muscle.**

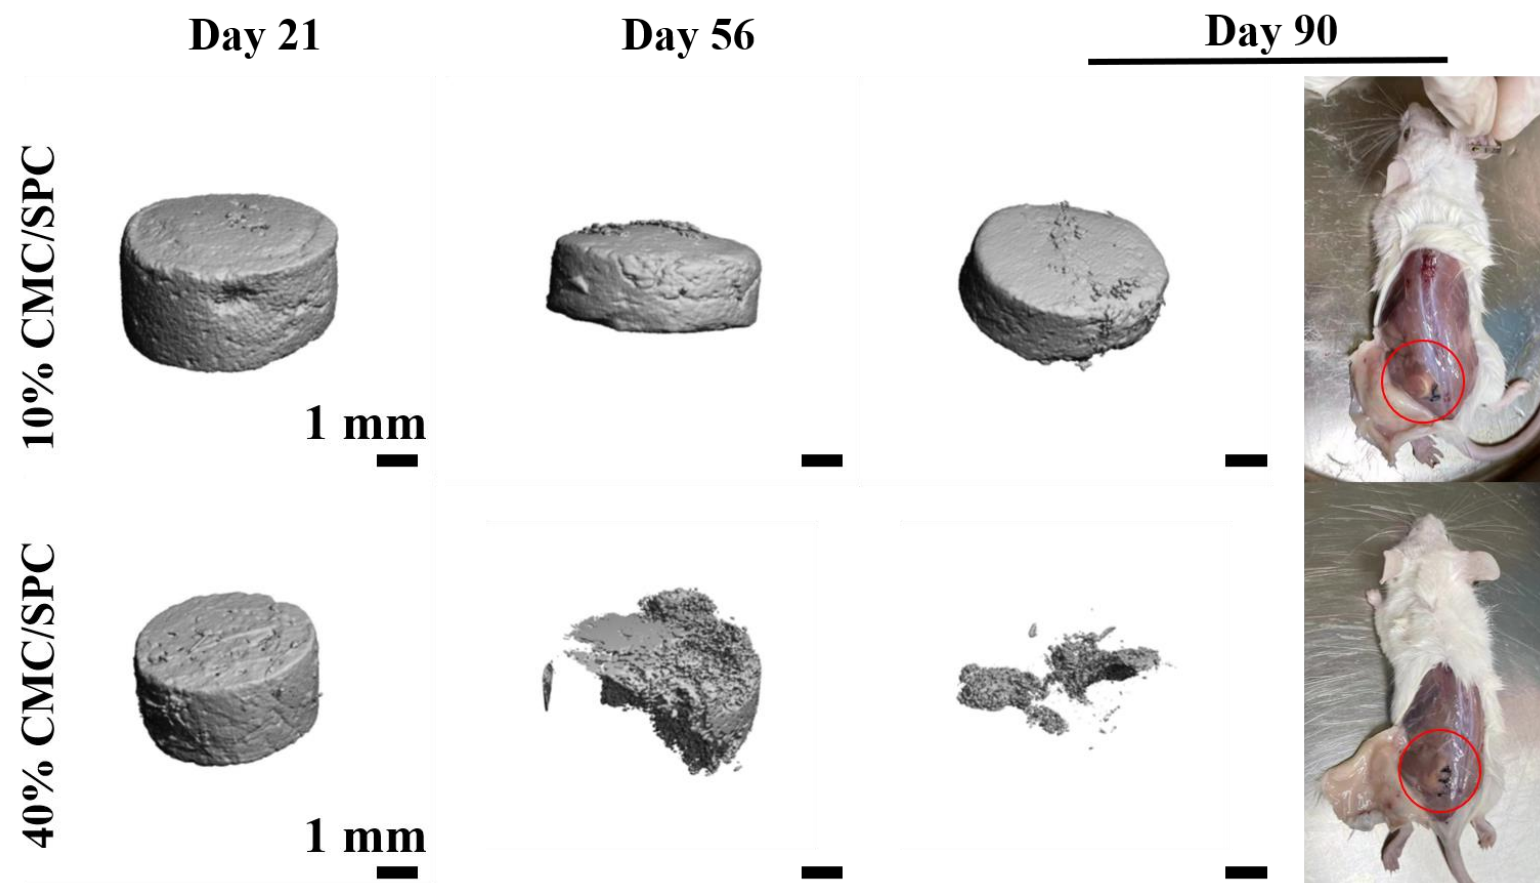

Figure S9. Representative micro-CT images on days 21, 56, and 90.

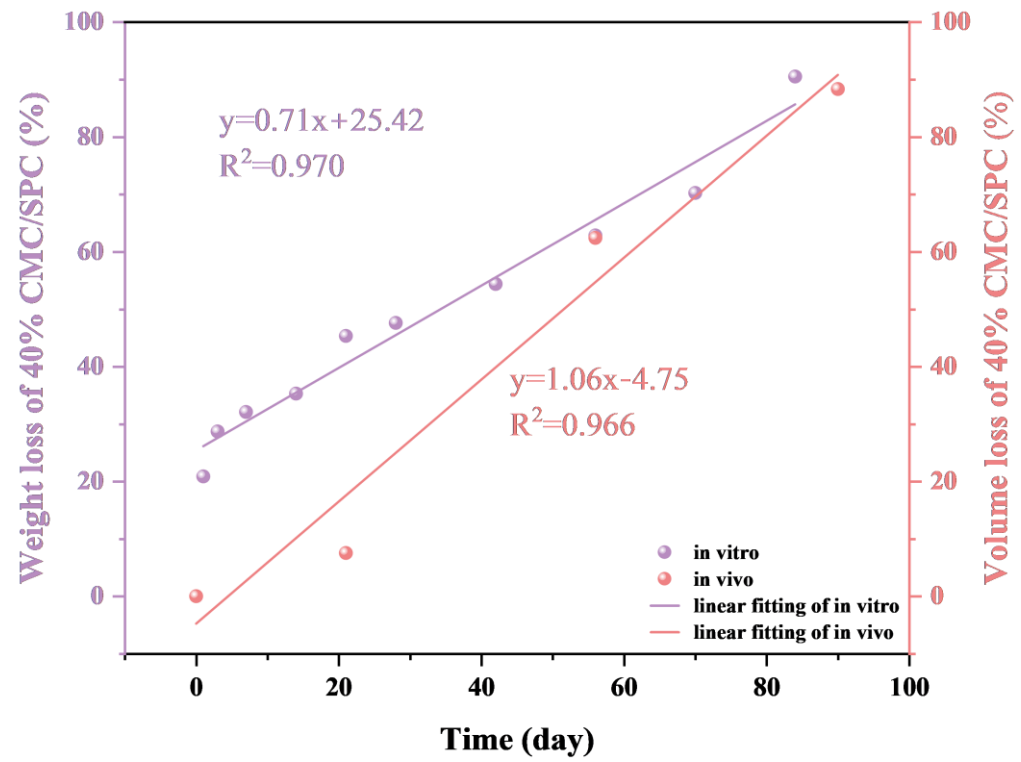

Figure S10. Comparison of in vivo and in vitro degradation for 40%CMC/SPC cement.

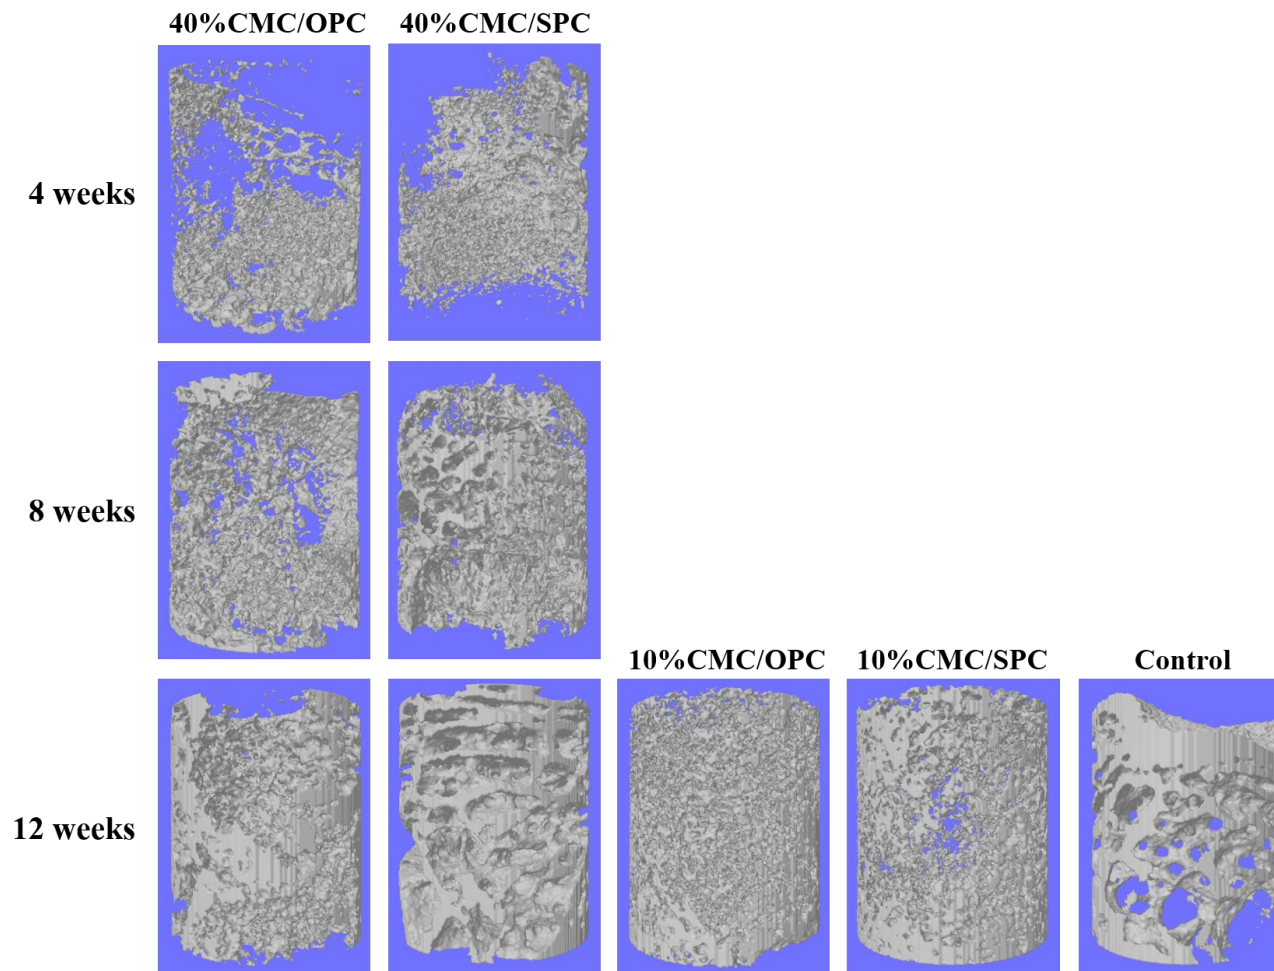

Figure S11. Reconstructed micro-CT images of the bone defect region at 4, 8, and 12 weeks.

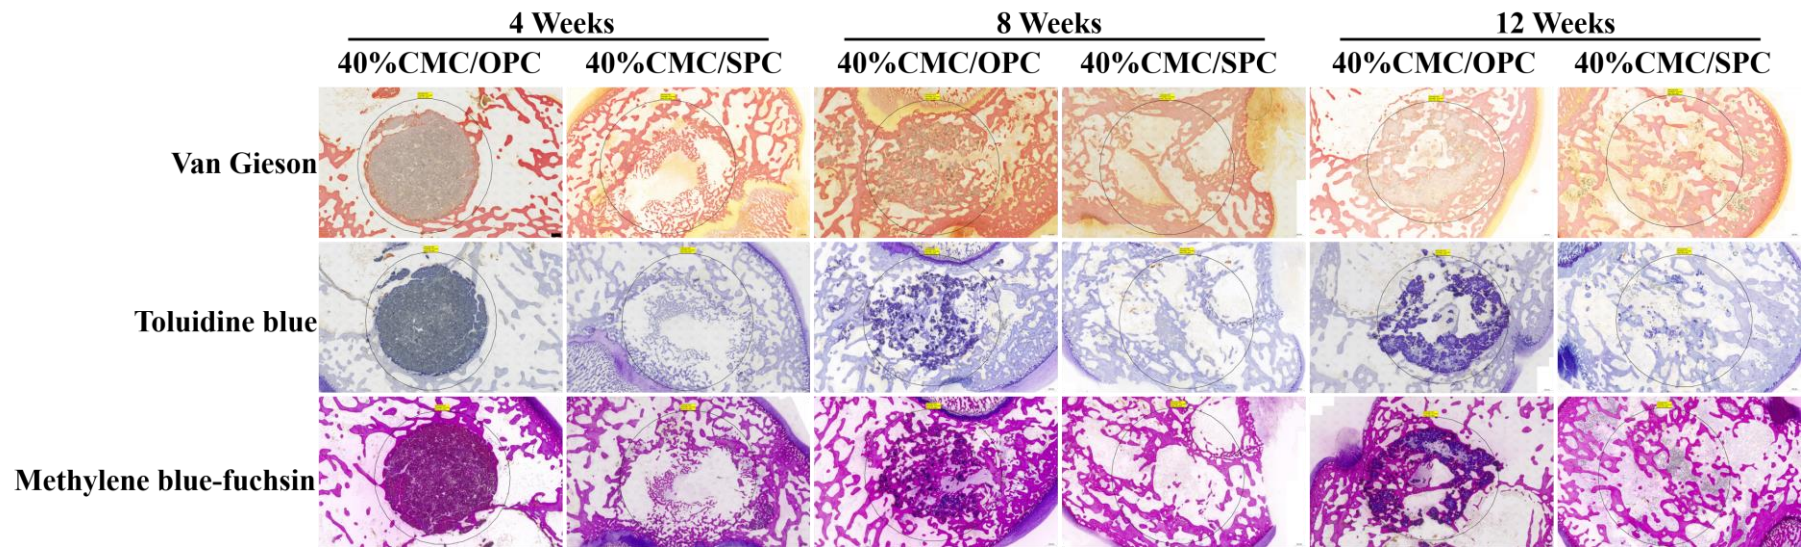

**Figure S12. Van gieson, toluidine blue, and methylene blue-fuchsin staining for bone tissue around different implants (scale bar: 500  $\mu$ m, black circles represent the area of bone defects).**

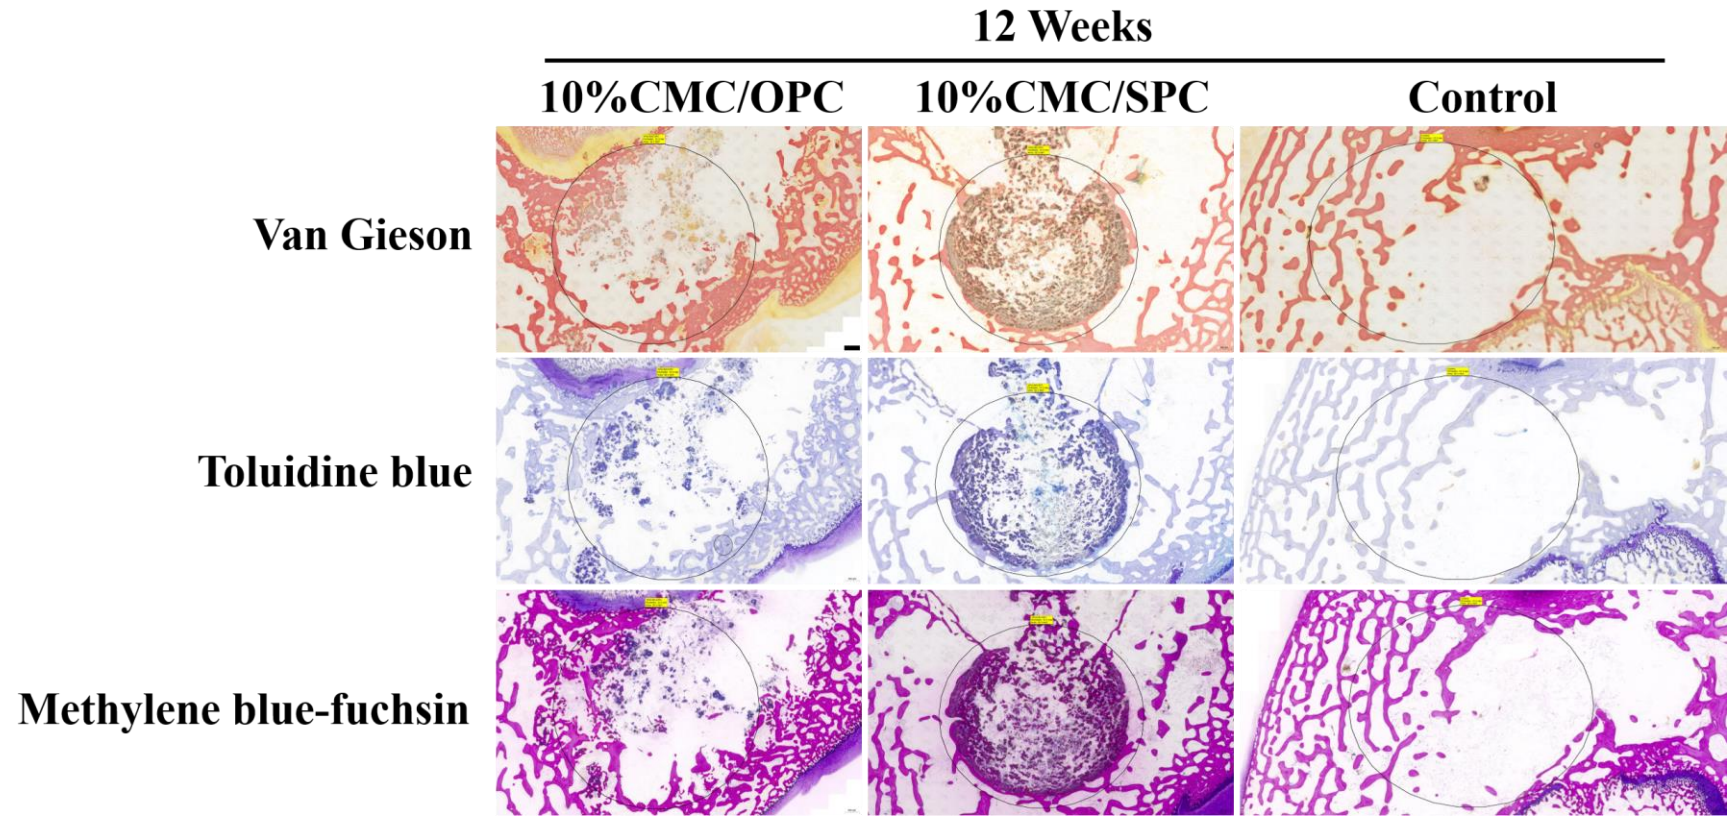

**Figure S13. Van gieson, toluidine blue, and methylene blue-fuchsin staining for bone tissue around different implants (scale bar: 500  $\mu$ m, black circles represent the area of bone defects).**

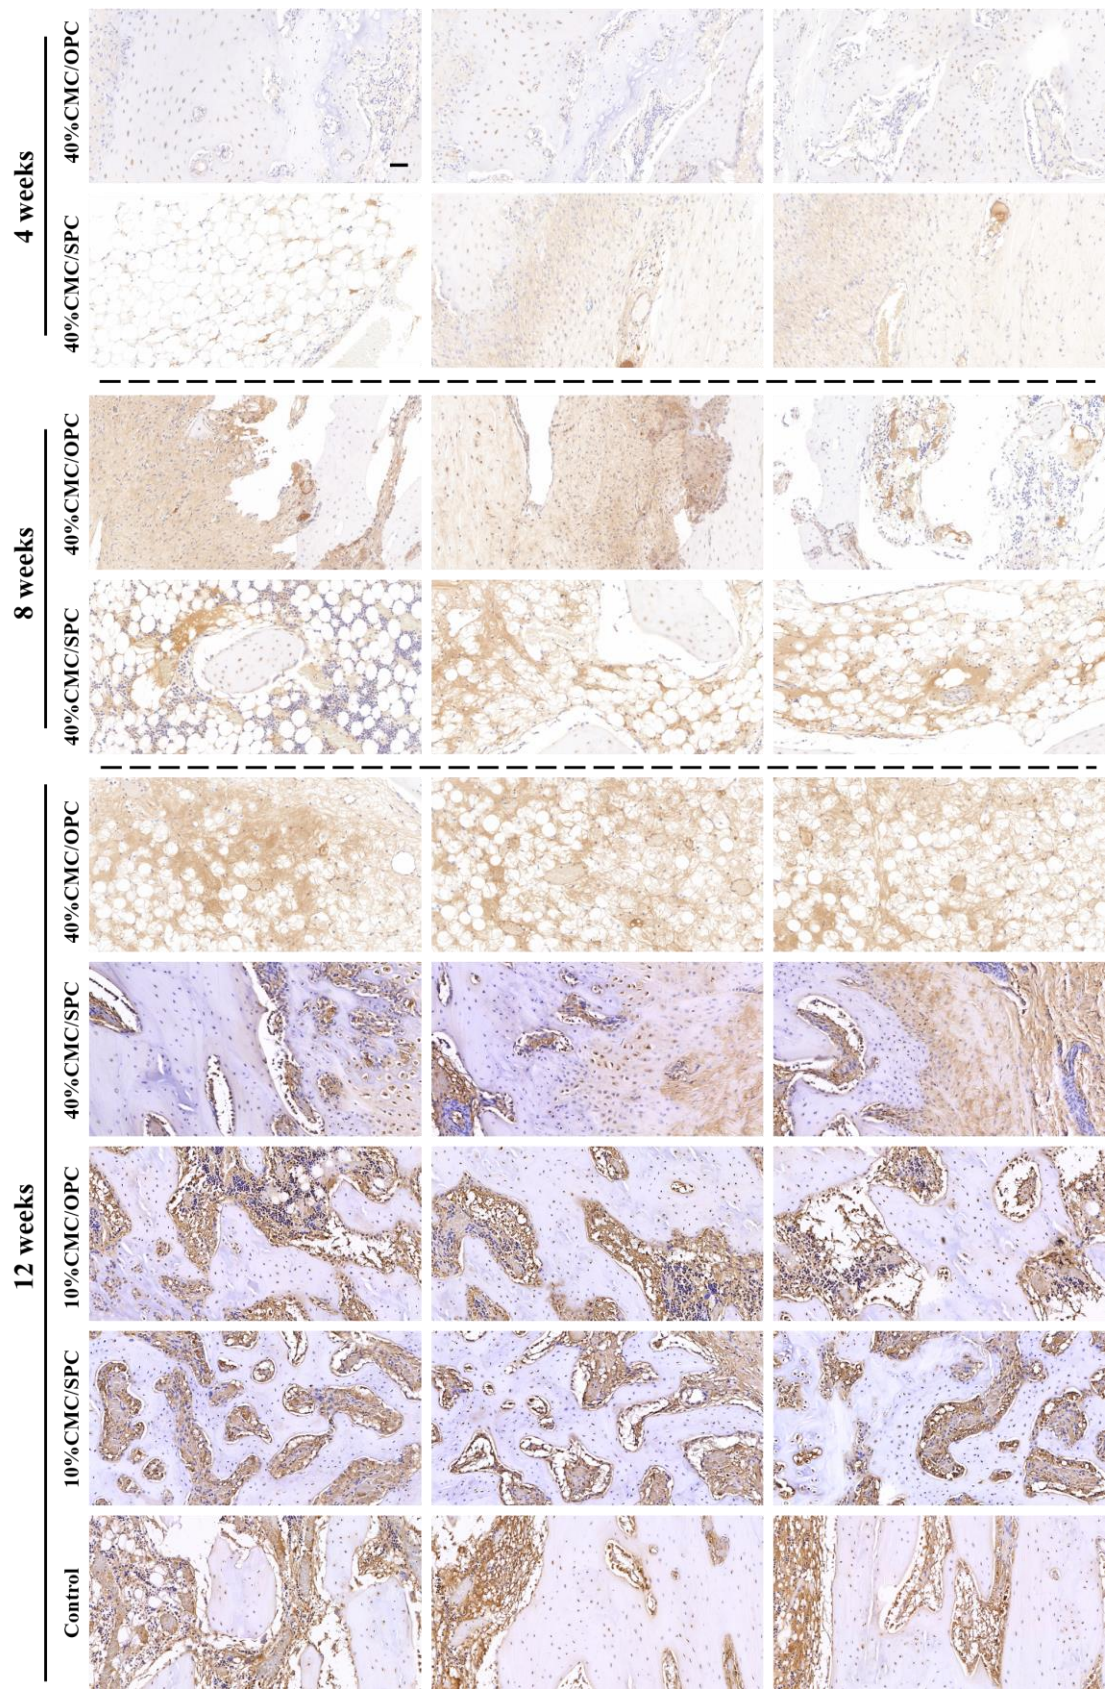

**Figure S14. Immunohistochemical staining of VEGF (scale bar: 50  $\mu$ m).**

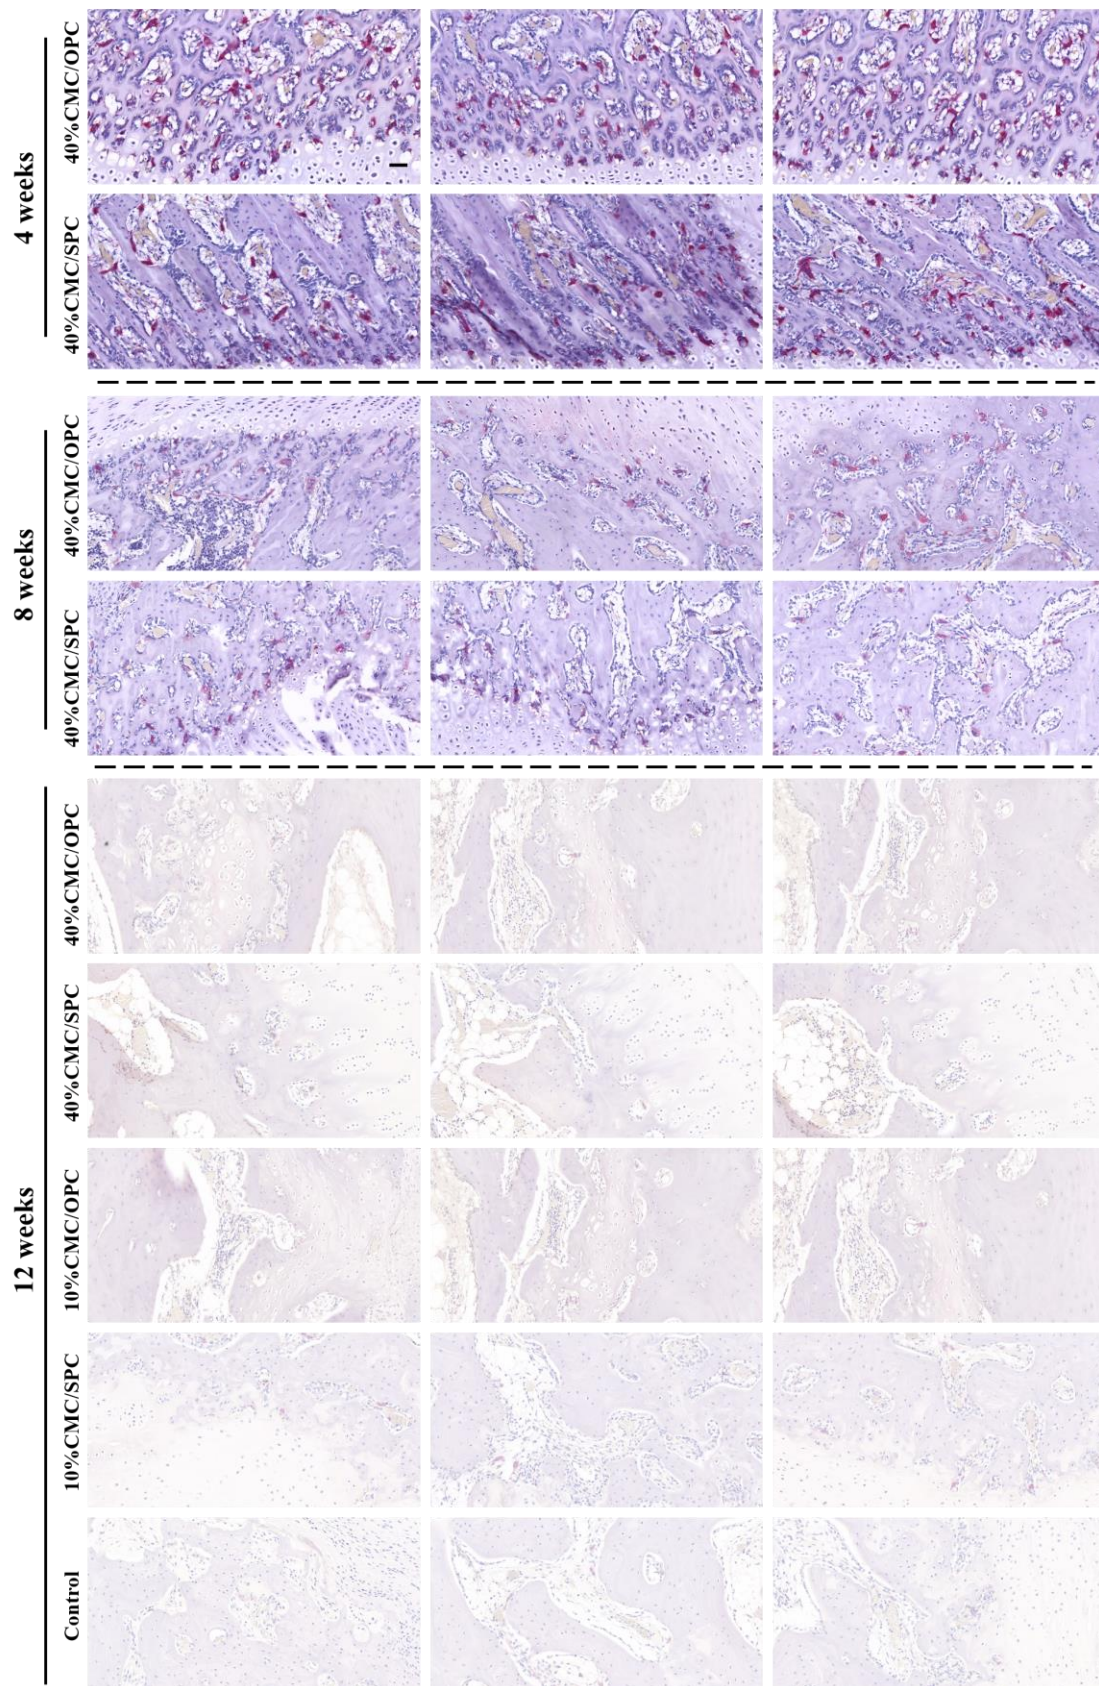

**Figure S15. Immunohistochemical staining of TRAP (scale bar: 50  $\mu$ m).**

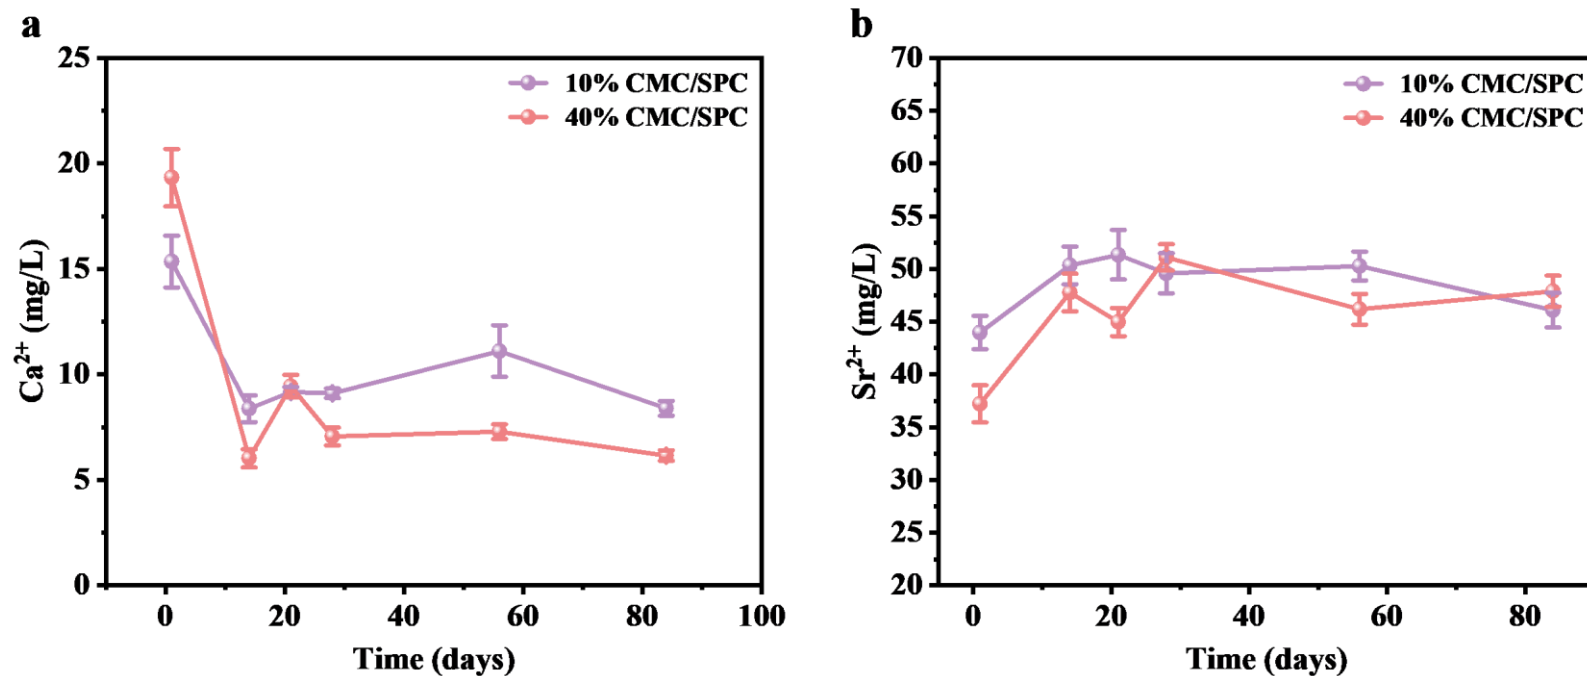

**Figure S16. The variation of Ca<sup>2+</sup> and Sr<sup>2+</sup> concentration in PBS during the degradation process.**

Figure S16a shows that the Ca<sup>2+</sup> concentration dropped from 15–20 mg/L to 5–10 mg/L during the first two weeks. This is because CaSO<sub>4</sub> gradually decreased as it degraded, and Ca<sup>2+</sup> could only be derived from the less soluble CaHPO<sub>4</sub> or Ca<sub>3</sub>PO<sub>4</sub>. After 20 days, the Ca<sup>2+</sup> concentration stabilized at around 10 mg/L. Figure S16b shows an increase in Sr<sup>2+</sup> concentration during the first two weeks, which is due to the fact that the  $K_{sp}$  of SrSO<sub>4</sub> is greater than that of CaHPO<sub>4</sub> or Ca<sub>3</sub>PO<sub>4</sub>. After 20 days, the Sr<sup>2+</sup> concentration stabilized at around 47 mg/L.

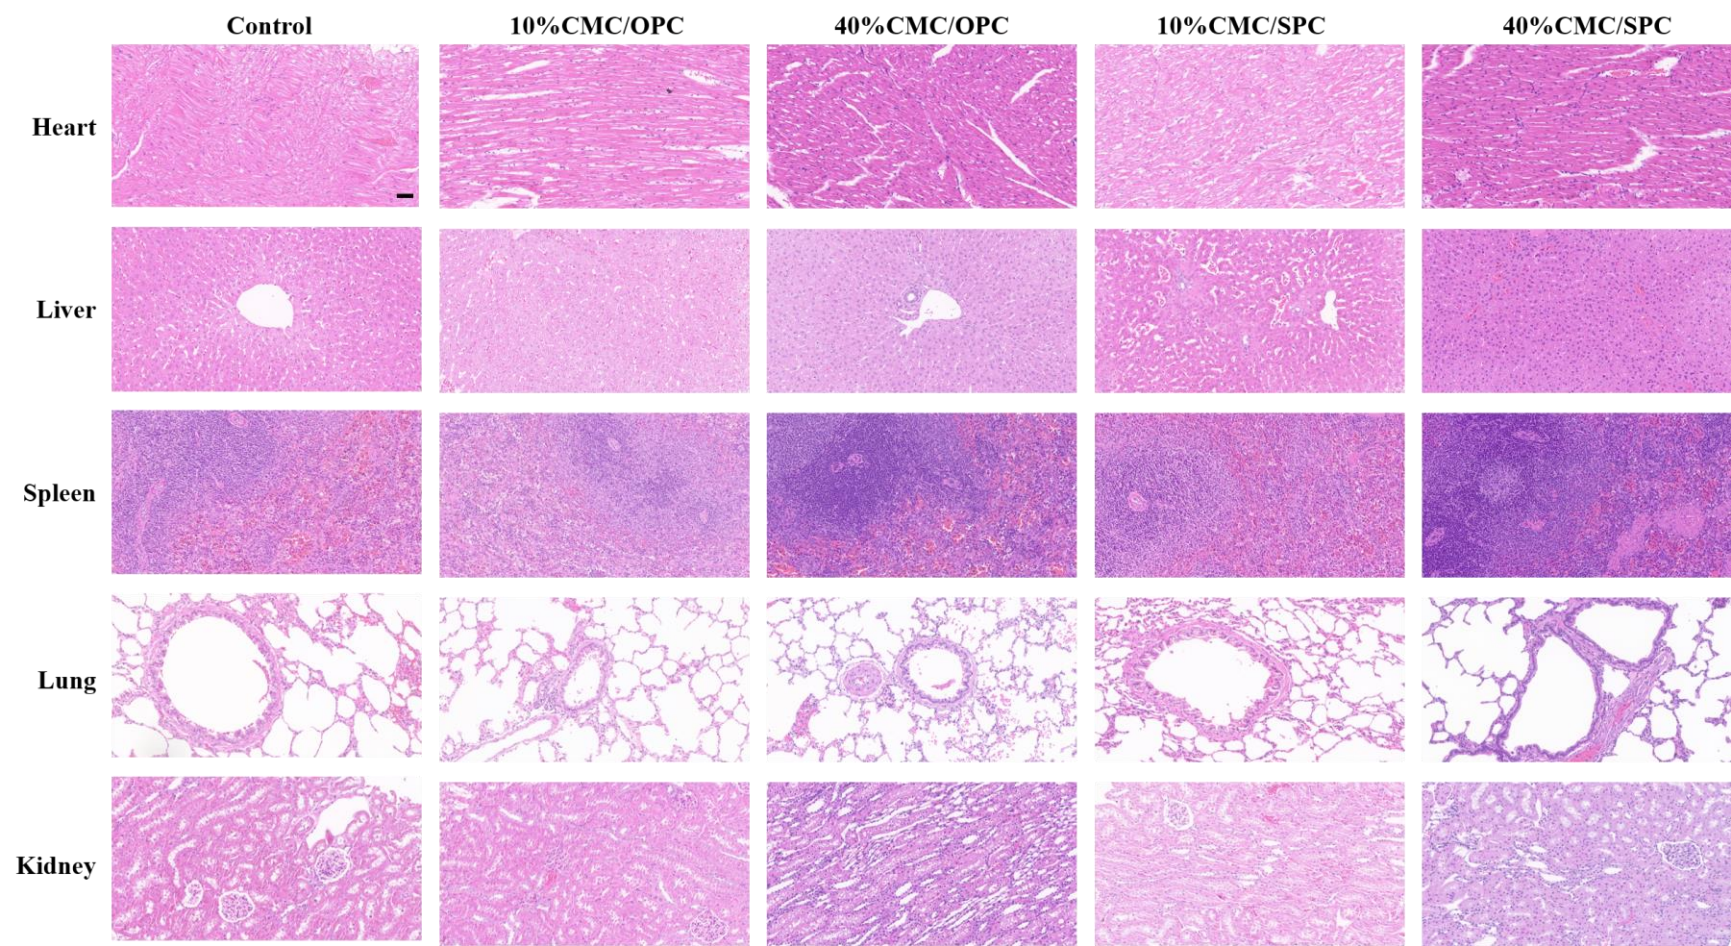

**Figure S17. H&E staining images of major organs (scale bar: 50  $\mu$ m).**

## 2. Supplementary Tables

**Table S1. Physicochemical properties and biological activity of different Sr-containing bone cements**

| Materials                                 | Compression strength (MPa) | Degradation (%) | Injectability (%) | Setting time (min)/ curing temperature (°C) | Bioactivity                                                       |
|-------------------------------------------|----------------------------|-----------------|-------------------|---------------------------------------------|-------------------------------------------------------------------|
| Sr-HA <sup>1</sup>                        | –                          | –               | –                 | 8-12/65                                     | Promoting angiogenesis and bone tissue formation                  |
| Sr-BC <sup>2</sup>                        | 17-25                      | –               | 40-100            | 7                                           | –                                                                 |
| SrCPC <sup>3</sup>                        | 13-23                      | –               | –                 | 3-7                                         | Inducing apatite deposition                                       |
| SrCaHA <sup>4</sup>                       | –                          | –               | –                 | 1-30                                        | –                                                                 |
| SrO-CPC <sup>5</sup>                      | 38-60                      | 20 (60 d)       | –                 | 10-15                                       | –                                                                 |
| CGRP-Sr-CPC <sup>6</sup>                  | 15-30                      | 12 (28 d)       | –                 | –                                           | Upregulating ALP, BMP2, OCN, and Runx2 expression                 |
| Sr-BCPC <sup>7</sup>                      | 9-38                       | 2 (28 d)        | –                 | 9-20                                        | Promoting the proliferation of MC3T3-E1 cells                     |
| Sr-BCs <sup>8</sup>                       | –                          | –               | –                 | –                                           | Inducing MCS and MC3T3-E1 cells<br>Inhibiting osteoclast activity |
| Sr-CPC-O <sup>9</sup>                     | 15-35                      | –               | –                 | 15-45                                       | –                                                                 |
| Rg1-Sr-TiO <sub>2</sub> /PP <sup>10</sup> | 21/41                      | –               | –                 | –                                           | Promoting angiogenesis                                            |

|                                      |       |           |        |          |                                                                                                            |
|--------------------------------------|-------|-----------|--------|----------|------------------------------------------------------------------------------------------------------------|
| mSCS-A <sup>11</sup>                 | 3-6   | –         | 65-95  | –        | Supporting hBMSC proliferation and osteogenesis differentiation                                            |
| Sr-HA <sup>12</sup>                  | –     | –         | –      | –        | Increasing OCN/Runx2 expression and bone formation                                                         |
| SIS/SrFeHA <sup>13</sup>             | –     | –         | –      | –        | Inducing angiogenesis/osteogenesis both in vitro and in vivo                                               |
| SrCS/SF <sup>14</sup>                | –     | 8 (14 d)  | –      | –        | Promoting the osteogenic and angiogenic activities                                                         |
| Sr+Ma-BrC <sup>15</sup>              | –     | –         | –      | 8-12     | Promoting new bone formation                                                                               |
| SrCSH/Sr-TCP <sup>16</sup>           | –     | –         | –      | –        | Supporting the proliferation, adhesion, and ALP activity of MC3T3-E1, matching the growth rate of new bone |
| Sr-TCP <sup>17</sup>                 | 13    | –         | –      | –        | Cytocompatibility for NCTC 3T3 and human DPSC cells                                                        |
| Sr-CS <sup>18</sup>                  | –     | 25 (56 d) | –      | –        | Appreciable biodissolution and high osteogenic capacity                                                    |
| HA-SrMg <sup>19</sup>                | –     | –         | –      | 33-39    | Increasing ALP and NO production                                                                           |
| Sr/Cu-BSG <sup>20</sup>              | 11-15 | 37 (21 d) | 88-94  | 14-23/31 | Regulating inflammation, angiogenesis, and osteogenesis                                                    |
| Sr-CS/CPC <sup>21</sup>              | 16-21 | 14 (28 d) | 96-98  | 16-40    | Enhancing osteogenesis and angiogenesis                                                                    |
| MPC_SrHPO <sub>4</sub> <sup>22</sup> | –     | 9 (56 d)  | 78-85  | 18-21    | –                                                                                                          |
| TCP-4Sr/CSH <sup>23</sup>            | 10-14 | 13 (56 d) | 23-100 | 5-17     | accelerating the biodegradation rate and new bone regeneration                                             |
| CS-BG <sup>24</sup>                  | 4     | –         | –      | 20-150   | improving mineralization of the extracellular matrix                                                       |

|                                                                     |        |           |        |       |                                                                                                                                                                                                                                         |
|---------------------------------------------------------------------|--------|-----------|--------|-------|-----------------------------------------------------------------------------------------------------------------------------------------------------------------------------------------------------------------------------------------|
| CSH/Sr-MBG-SG <sup>25</sup>                                         | 4-17   | 68 (28 d) | 75-100 | 57-96 | Inducing apatite deposition                                                                                                                                                                                                             |
| Csi@HT <sup>26</sup>                                                | 5-9    | 28 (28 d) | –      | –     | Stimulating osteogenic potential                                                                                                                                                                                                        |
| Zn/Sr-CS/CPC <sup>27</sup>                                          | 15-20  | 17 (28 d) | 65-85  | 32-45 | Stimulating osteogenesis-related genes (ALP, Runx2, COLI, OCN, and OPN) and angiogenesis-related genes (VEGF, bFGF, and eNOS)                                                                                                           |
| SrR/PA-MOC <sup>28</sup>                                            | 20-100 | 20 (28 d) | –      | –     | Improving the ALP expression and new bone formation                                                                                                                                                                                     |
| Mg-Sr-CS <sup>29</sup>                                              | 7-12   | 11 (28 d) | –      | 14-16 | Promoting the in vitro osteogenesis and angiogenesis                                                                                                                                                                                    |
| C <sub>2</sub> S(2P <sub>6</sub> )C <sub>2</sub> S/Sr <sup>30</sup> | –      | –         | –      | –     | Increasing COLI, Runx2, OCN and ALP expression                                                                                                                                                                                          |
| This work<br>(40%CMC/SPC)                                           | 66     | 88 (90 d) | 98     | 50/35 | Supporting mBMSC proliferation and<br>osteogenesis differentiation<br>Increasing COLI, Runx2, OCN and ALP expression<br>Triggering macrophage polarization towards M2<br>Inhibiting osteoclast activity<br>Promoting new bone formation |

**Table S2. Composition of SBF (1000 mL) used in the apatite mineralization study.**

|            | NaCl    | NaHCO <sub>3</sub> | KCl     | K <sub>2</sub> HPO <sub>4</sub> ·3H <sub>2</sub> O | MgCl <sub>2</sub> ·6H <sub>2</sub> O | 1.0 M HCl | CaCl <sub>2</sub> | Na <sub>2</sub> SO <sub>4</sub> | Tris    | HCl    |
|------------|---------|--------------------|---------|----------------------------------------------------|--------------------------------------|-----------|-------------------|---------------------------------|---------|--------|
| Amounts    | 8.035 g | 0.355 g            | 0.225 g | 0.231 g                                            | 0.311 g                              | 39 mL     | 0.292 g           | 0.072 g                         | 6.118 g | 0~5 mL |
| Purity (%) | ≥99.5   | ≥99.5              | ≥99.5   | ≥99.0                                              | ≥98.0                                | -         | ≥96.0             | ≥99.0                           | ≥99.5   | -      |

**Table S3. Primer sequences for RT-PCR.**

| Genes                 | ID           | Direction | Sequences                 |
|-----------------------|--------------|-----------|---------------------------|
| <b>GAPDH</b>          | <b>14433</b> | FORWARD   | GGTTGTCTCCTGCGACTTCA      |
|                       |              | REVERSE   | TGGTCCAGGGTTTCTTACTCC     |
| <b>COL1</b>           | <b>12842</b> | FORWARD   | TAAGGGTCCCCAATGGTGAGA     |
|                       |              | REVERSE   | GGGTCCCTCGACTCCTACAT      |
| <b>Runx2</b>          | <b>12393</b> | FORWARD   | CCTTCAAGGTTGTAGCCCTC      |
|                       |              | REVERSE   | GGAGTAGTTCTCATCATTCCCG    |
| <b>OPN</b>            | <b>20750</b> | FORWARD   | AAACACACAGACTTGAGCATTG    |
|                       |              | REVERSE   | TTAGGGTCTAGGACTAGCTTGT    |
| <b>OCN</b>            | <b>12096</b> | FORWARD   | CAAGCAGGAGGGCAATAAGGTAGTG |
|                       |              | REVERSE   | CGGTCTTCAAGCCATACTGGTCTG  |
| <b><i>β</i>-Actin</b> | <b>11461</b> | FORWARD   | GTGCTATGTTGCTCTAGACTTCG   |
|                       |              | REVERSE   | ATGCCACAGGATTCCATACC      |
| <b>iNOS</b>           | <b>18126</b> | FORWARD   | ACTCAGCCAAGCCCTCACCTAC    |
|                       |              | REVERSE   | TCCAATCTCTGCCTATCCGTCTCG  |
| <b>Arg</b>            | <b>11846</b> | FORWARD   | CATATCTGCCAAAGACATCGTG    |
|                       |              | REVERSE   | GACATCAAAGCTCAGGTGAATC    |

**Table S4. Atomic percentages of different elements for the white rectangular region in Figure 1c.**

| Elements | CaSO <sub>4</sub> ·2H <sub>2</sub> O | CaSO <sub>4</sub> ·1/2H <sub>2</sub> O | Sr-HA | SrSO <sub>4</sub> | CaHPO <sub>4</sub> | CMC   |
|----------|--------------------------------------|----------------------------------------|-------|-------------------|--------------------|-------|
| C        | 13.20                                | 11.53                                  | 15.65 | 48.19             | 19.91              | 55.76 |
| O        | 60.87                                | 50.57                                  | 43.92 | 30.02             | 56.17              | 33.35 |
| Na       | 0.22                                 | 0.18                                   | -     | -                 | 0.88               | 6.13  |
| P        | 2.78                                 | 6.34                                   | 11.10 | 0.83              | 11.25              | 1.99  |
| S        | 10.18                                | 12.13                                  | 5.06  | 11.42             | 0.49               | 0.41  |
| Ca       | 11.98                                | 17.89                                  | 9.59  | 0.26              | 10.14              | 1.41  |
| Sr       | 0.78                                 | 1.36                                   | 14.68 | 9.28              | 1.16               | 0.73  |

### 3. References

1. C. T. Wong, W. W. Lu, W. K. Chan, K. M. C. Cheung, K. D. K. Luk, D. S. Lu, A. B. M. Rabie, L. F. Deng and J. C. Y. Leong, *Journal of Biomedical Materials Research Part A*, 2004, 68A, 513-521.
2. S. Pina, P. M. C. Torres and J. M. F. Ferreira, *Journal of Materials Science: Materials in Medicine*, 2010, 21, 431-438.
3. S. Pina, P. M. Torres, F. Goetz-Neunhoeffler, J. Neubauer and J. M. F. Ferreira, *Acta Biomaterialia*, 2010, 6, 928-935.
4. D. Guo, M. Mao, W. Qi, H. Li, P. Ni, G. Gao and K. Xu, *Journal of Materials Science: Materials in Medicine*, 2011, 22, 2631-2640.
5. Y. Tao, D. Li and Y. Li, *Journal of Wuhan University of Technology-Mater. Sci. Ed.*, 2013, 28, 741-745.
6. W. Liang, L. Li, X. Cui, Z. Tang, X. Wei, H. Pan and B. Li, *Journal of Applied Biomaterials & Functional Materials*, 2016, 14, 431-440.
7. H. Zhu, D. Guo, W. Qi and K. Xu, *Biomedical Materials*, 2017, 12, 015016.
8. M. Montesi, S. Panseri, M. Dapporto, A. Tampieri and S. Sprio, *PLOS ONE*, 2017, 12, e0172100.
9. T. Yu, S. Zeng, X. Liu, H. Shi, J. Ye and C. Zhou, *Ceramics International*, 2017, 43, 12579-12587.
10. M. Salarian, W. Z. Xu, R. Bohay, E. M. K. Lui and P. A. Charpentier, *Macromolecular Bioscience*, 2017, 17, 1600156.
11. M. Qiu, D. Chen, C. Shen, J. Shen, H. Zhao and Y. He, *RSC Advances*, 2017, 7, 23671-23679.
12. C. Huang, D. Li, J. Song, K. Chen, X. Wang, F. Zhao, X. Gu, X. Xie and Y. Fan, *Applied Materials Today*, 2023, 30, 101723.
13. W. Cui, L. Yang, I. Ullah, K. Yu, Z. Zhao, X. Gao, T. Liu, M. Liu, P. Li, J. Wang and X. Guo, *Biomedical Materials*, 2022, 17, 025008.
14. Y. Zhou, Y. Hu, M. Uemura, L. Xia, X. Yu and Y. Xu, *Frontiers in Bioengineering and Biotechnology*, 2022, 10, 842530.
15. S. K. Nandi, M. Roy, A. Bandyopadhyay and S. Bose, *Journal of Biomedical Materials Research Part B: Applied Biomaterials*, 2023, 111,

599-609.

16. Q. Miao, N. Jiang, Q. Yang, I. M. Hussein, Z. Luo, L. Wang and S. Yang, *Biomedical Materials*, 2022, 17, 015014.

17. J. V. Rau, I. V. Fadeeva, A. A. Forysenkova, G. A. Davydova, M. Fosca, Y. Y. Filippov, I. V. Antoniac, A. Antoniac, A. D'Arco, M. Di Fabrizio, M. Petrarca, S. Lupi, M. Di Menno Di Bucchianico, V. G. Yankova, V. I. Putlayev and M. B. Cristea, *Advanced Materials Interfaces*, 2022, 9, 2200803.

18. Y. Cong, Z. Liang, N. Jianping, H. Wenyue, G.-A. E. Prince and X. Zhang, *Medical & Biological Engineering & Computing*, 2022, 60, 1691-1703.

19. A. M. Dias, I. do Nascimento Canhas, C. G. O. Bruziquesi, M. G. Speziali, R. D. Sinisterra and M. E. Cortés, *Biological Trace Element Research*, 2023, 201, 2963-2981.

20. S. Li, L. Zhang, C. Liu, J. Kim, K. Su, T. Chen, L. Zhao, X. Lu, H. Zhang, Y. Cui, X. Cui, F. Yuan and H. Pan, *Bioactive Materials*, 2023, 23, 101-117.

21. T. Wu, T. Lu, H. Shi, J. Wang and J. Ye, *Ceramics International*, 2023, 49, 6630-6645.

22. R. Gelli, G. Bernardini and F. Ridi, *Ceramics International*, 2023, 49, 31466-31476.

23. H. Chen, M. Shen, J. Shen, Y. Li, R. Wang, M. Ye, J. Li, C. Zhong, Z. Bao, X. Yang, X. Li, Z. Gou and S. Xu, *Biomaterials Advances*, 2022, 141, 213098.

24. N. Moazeni, S. Hesarakhi, A. Behnamghader, J. Esmaeilzadeh, G. Orive, A. Dolatshahi-Pirouz and S. Borhan, *Biomedicines*, 2023, 11, 2833.

25. F. Banche-Niclot, I. Corvaglia, C. Cavallera, E. Boggio, C. L. Gigliotti, U. Dianzani, A. Tzagiollari, N. Dunne, A. Manca, S. Fiorilli and C.

Vitale-Brovarone, *Biomolecules*, 2023, 13, 94.

26. Z. Bao, J. Yang, J. Shen, C. Wang, Y. Li, Y. Zhang, G. Yang, C. Zhong, S. Xu, L. Xie, M. Shen and Z. Gou, *Journal of Materials Chemistry B*, 2023, 11, 2417-2430.

27. X. Yuan, T. Wu, T. Lu and J. Ye, *ACS Biomaterials Science & Engineering*, 2023, 9, 5761-5771.

28. T. Ma, Y. Guan, J. Feng, Y. Yang, J. Chen, W. Guo, J. Liao and Y. Zhang, *Biomaterials Research*, 2023, 27, 128.

29. C.-Y. Wang, C.-Y. Chen, K.-H. Chen, Y.-H. Lin, T.-P. Yeh, A. Kai-Xing Lee, C.-C. Huang and M.-Y. Shie, *Ceramics International*, 2024, 50, 7121-7131.

30. J. Elango, K. Salazar, P. Velasquez, A. Murciano, P. N. de Aza, W. Wu, J. M. Granero Marín and J. E. Mate Sanchez de Val, *Ceramics International*, 2024, 50, 16998-17010.
